# Supplementary material for: Ramosetron versus Palonosetron in Combination with Aprepitant and Dexamethasone for the Control of Highly-Emetogenic Chemotherapy-Induced Nausea and Vomiting
Source: PubMed Central journal article supplement — Cancer Res Treat. 2020 Mar 18;52(3):907–16. doi: 10.4143/crt.2019.713 (PMC7373869; doi:10.4143/crt.2019.713), 2020-03-18
Supplement: crt-2019-713-suppl2.pdf [file crt-2019-713-suppl2.pdf]

**S2 Table.** Chemotherapy regimens

| Regimen                                                                   | RAD<br>(n=137) | PAD<br>(n=142) |
|---------------------------------------------------------------------------|----------------|----------------|
| <b>Cisplatin-based chemotherapy</b>                                       |                |                |
| Etoposide/cisplatin                                                       | 16 (11.7)      | 16 (11.3)      |
| Gemcitabine/cisplatin                                                     | 17 (12.4)      | 14 (9.9)       |
| Navelbine/cisplatin                                                       | 16 (11.7)      | 13 (9.2)       |
| Pemetrexed/cisplatin                                                      | 12 (8.8)       | 16 (11.3)      |
| Paclitaxel/ciplatin +/- Avastin                                           | 5 (3.6)        | 6 (4.2)        |
| 5-fluorouracil/cisplatin +/- Erbitux                                      | 7 (5.1)        | 9 (6.4)        |
| Docetaxel/5-fluorouracil/cisplatin                                        | 5 (3.7)        | 9 (6.4)        |
| Docetaxel/cisplatin                                                       | 5 (3.7)        | 8 (5.7)        |
| TS-1/cisplatin                                                            | 1 (0.8)        | 4 (2.9)        |
| Capecitabine/cisplatin +/- Herceptin                                      | 6 (4.4)        | 0              |
| Cyclophosphamide/adriamycin/cisplatin                                     | 1 (0.8)        | 1 (0.8)        |
| Rituximab-FP                                                              | 1 (0.8)        | 0              |
| Etoposide/ifosfamide/cisplatin                                            | 1 (0.8)        | 0              |
| <b>Non-cisplatin-based chemotherapy</b>                                   |                |                |
| Adriamycin/cyclophosphamide                                               | 33 (24.1)      | 31 (21.9)      |
| Adriamycin/cisplatin/vincristine/cyclophosphamide                         | 0              | 1 (0.8)        |
| Cyclophosphamide/adriamycin/vincristine/cyclophosphamide<br>+/- rituximab | 7 (5.2)        | 11 (7.7)       |
| Etoposide/prednisone/vincristine/cyclophosphamide/adriamycin              | 0              | 2 (1.5)        |
| Dacarbazine                                                               | 1 (0.8)        | 1 (0.8)        |
| Mesna/doxorubicin/ifosfamide/dacarbazine                                  | 1 (0.8)        | 0              |
| Methotrexate/vinblastine/adriamycin/cisplatin                             | 1 (0.8)        | 0              |
| Vincristine/dactinomycin/cyclophosphamide                                 | 1 (0.8)        | 0              |

Values are presented as number (%). RAD, ramosetron, aprepitant, and dexamethasone; PAD, palonosetron, aprepitant, and dexamethasone.
